# Supplementary material for: Degradation of aquatic sulfadiazine by Fe0/persulfate: kinetics, mechanisms, and degradation pathway
Source: Royal Society of Chemistry journal article supplement (doi:10.1039/c7ra07920f), 2017-01-01
Supplement: c7ra07920f1.pdf [file c7ra07920f1.pdf]

## Supplementary Data

Degradation of aquatic sulfadiazine by Fe<sup>0</sup>/persulfate: Kinetics, mechanisms,  
and degradation pathway

Shidong Yang\* and Di Che

School of Civil Engineering and Architecture, Northeast Electric Power University, Jilin 132012, PR China.

\*Corresponding author contact information:  
E-mail address: ysd\_nedu@163.com.

Number of pages (including this page): 29  
Number of Figures: 28  
Number of Tables: 1

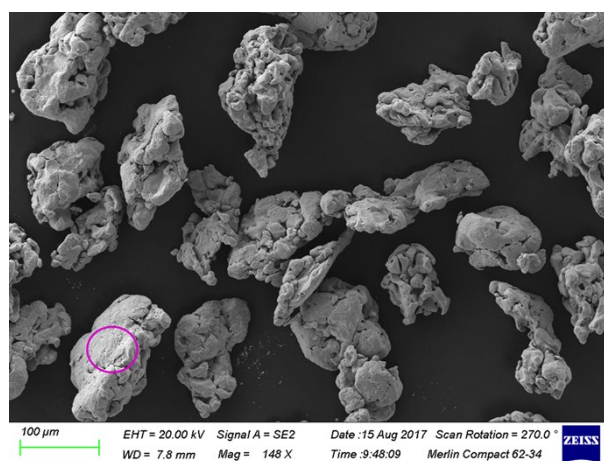

(a)

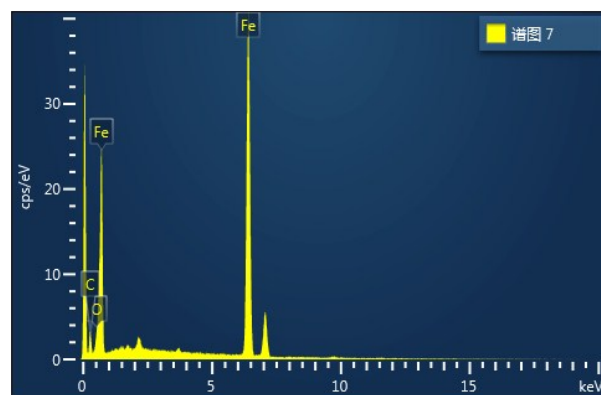

| Element | wt%    | atom%  |
|---------|--------|--------|
| O       | 2.41   | 7.93   |
| Fe      | 97.59  | 92.07  |
| Total:  | 100.00 | 100.00 |

(b)

Fig. S1 SEM (a) of  $\text{Fe}^0$  particles in addition to their corresponding X-ray spectra (b)

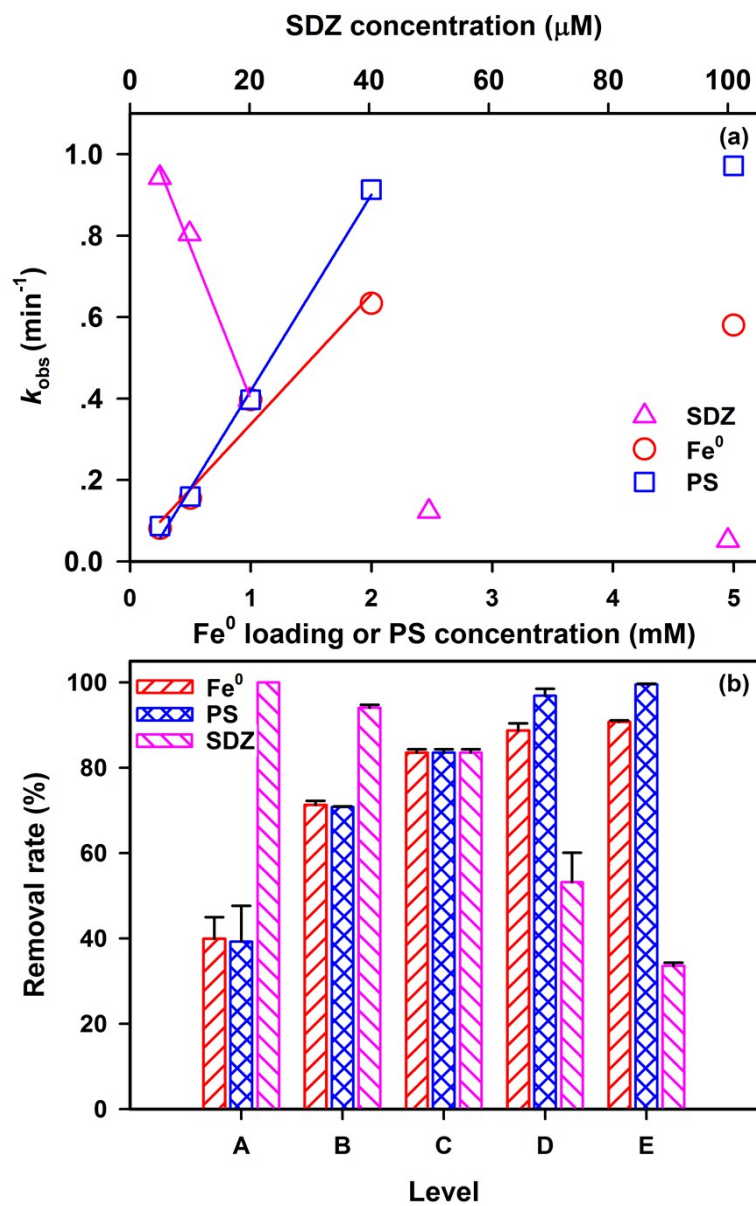

Fig. S2 Effects of treatment factors on rate constant (a) and removal rate (b) of aquatic SDZ degradation by Fe<sup>0</sup>/PS. Reaction conditions: initial pH 7.0, rpm = 600, and T = 20 ± 1 °C.

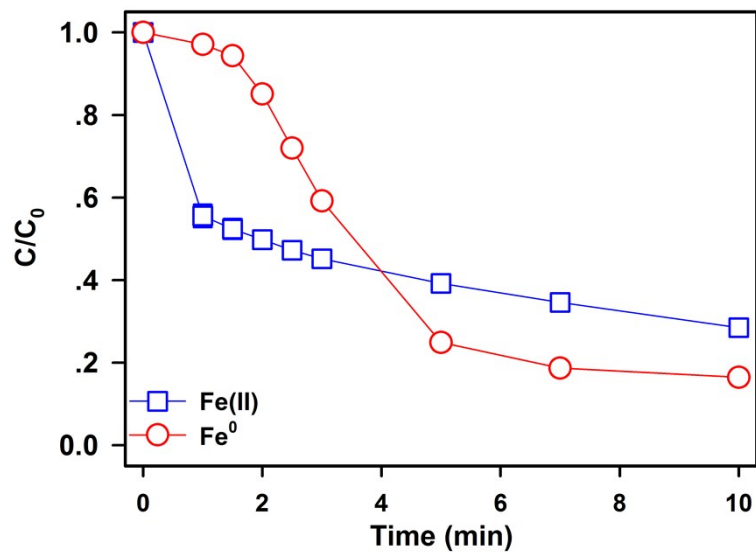

Fig. S3 Comparing experiment of aquatic SDZ degradation by Fe<sup>0</sup>/PS and Fe(II)/PS.

Reaction conditions:  $[\text{SDZ}]_0 = 20 \mu\text{M}$ ,  $[\text{Fe}^0]_0 = 1 \text{ mM}$ ,  $[\text{Fe(II)}]_0 = 1 \text{ mM}$ ,  $[\text{PS}] = 1 \text{ mM}$ ,

initial pH 7.0, rpm = 600, and  $T = 20 \pm 1 \text{ }^\circ\text{C}$ .

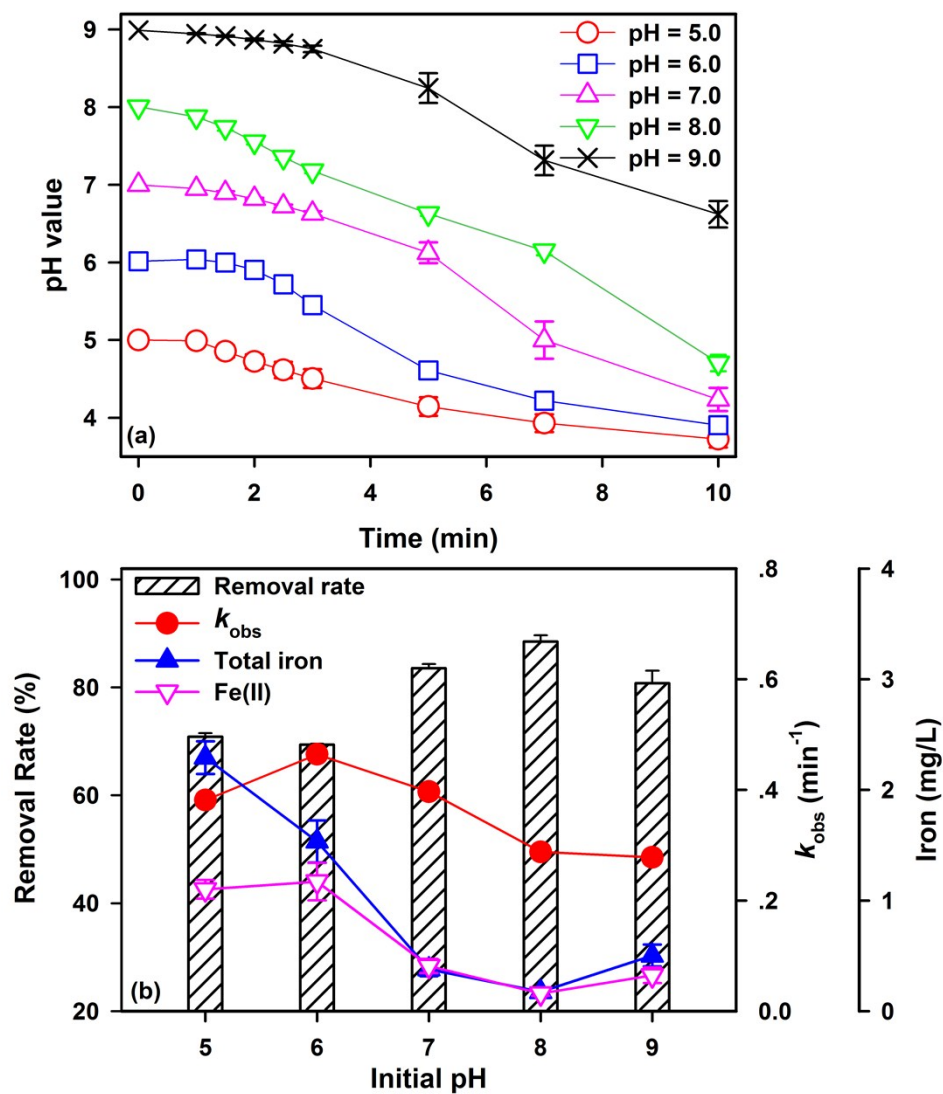

Fig. S4 The variation of pH value at different initial pH (a), and the rate constant, the final removal rate of aquatic SDZ degradation, the concentration of total dissolving iron and dissolving Fe(II) by the end of the reaction at different initial pH (b) in the  $\text{Fe}^0/\text{PS}$  system.

Reaction conditions:  $[\text{SDZ}]_0 = 20 \mu\text{M}$ ,  $[\text{Fe}^0]_0 = 1 \text{ mM}$ ,  $[\text{PS}] = 1 \text{ mM}$ , rpm = 600, and T = 20

$\pm 1 \text{ }^\circ\text{C}$ .

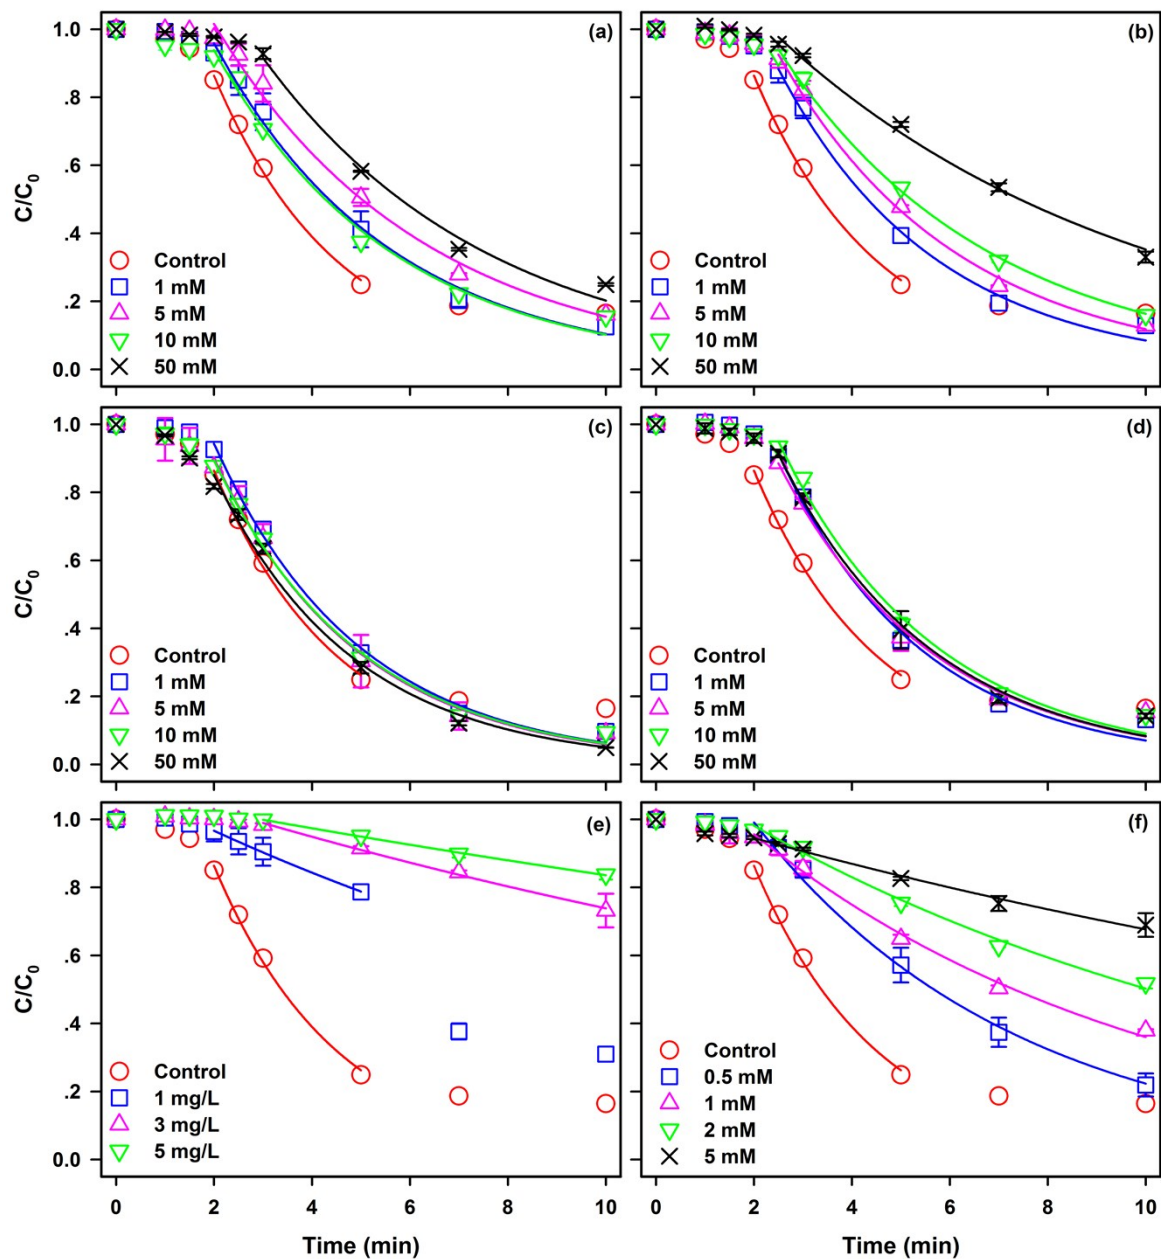

Fig. S5 Effects of  $\text{SO}_4^{2-}$  (a),  $\text{NO}_3^-$  (b),  $\text{Cl}^-$  (c),  $\text{ClO}_4^-$  (d), humic acid (e), and  $\text{HCO}_3^-$  (f) on degradative kinetics of aquatic SDZ by  $\text{Fe}^0/\text{PS}$ . Reaction conditions:  $[\text{SDZ}]_0 = 20 \mu\text{M}$ ,

$[\text{Fe}^0]_0 = 1 \text{ mM}$ ,  $[\text{PS}] = 1 \text{ mM}$ , initial  $\text{pH} = 7.0$ ,  $\text{rpm} = 600$ , and  $T = 20 \pm 1 \text{ }^\circ\text{C}$ .

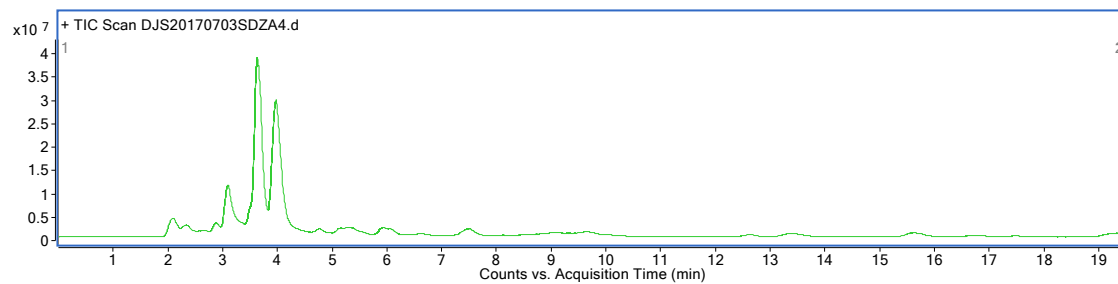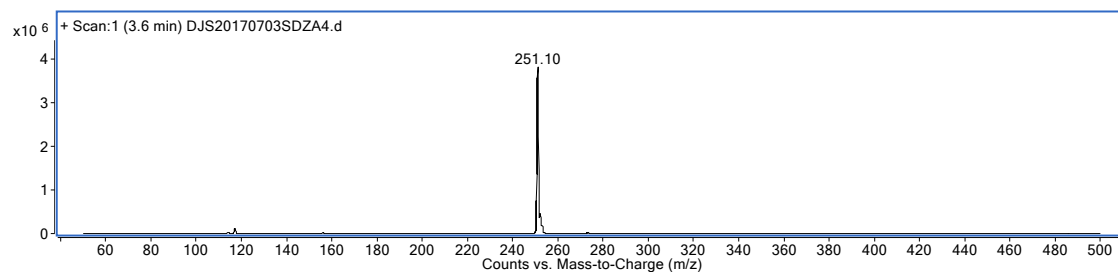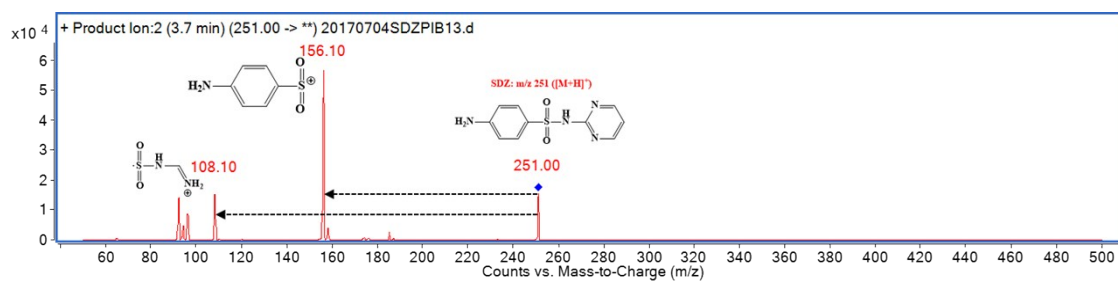

Fig. S6 Identification of SDZ ( $m/z^+$  251)  
Product ion 156 and 108

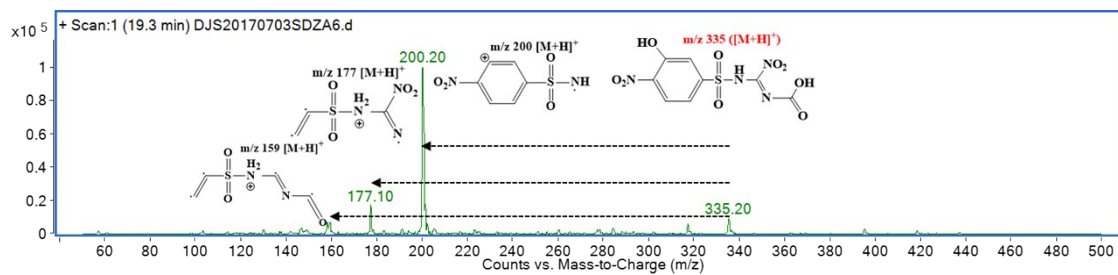

Fig. S7 Identification of P13 ( $m/z^+$  335)  
Product ion 200 , 177, and 159



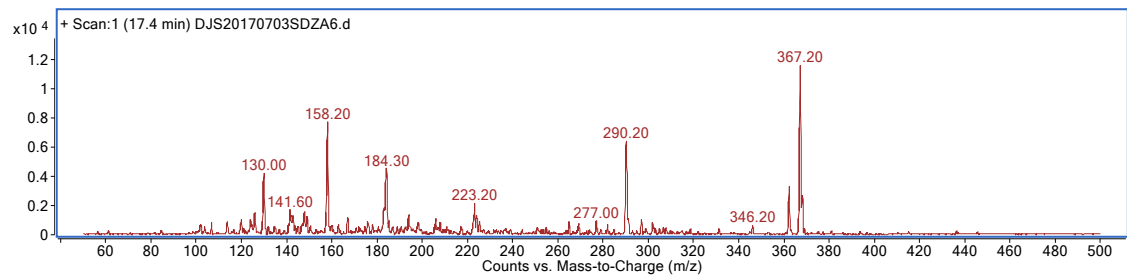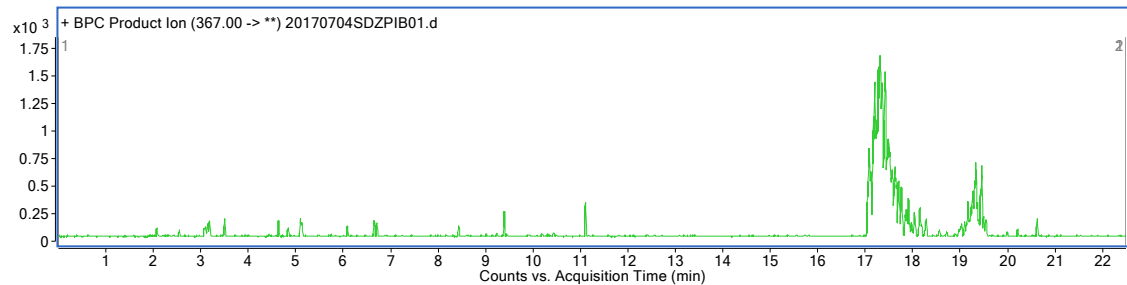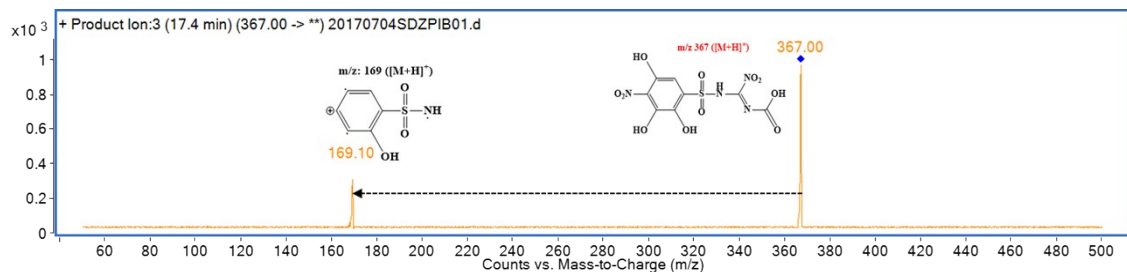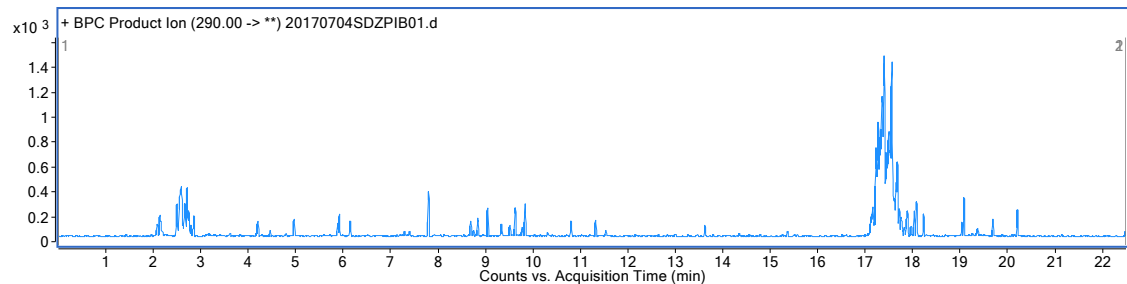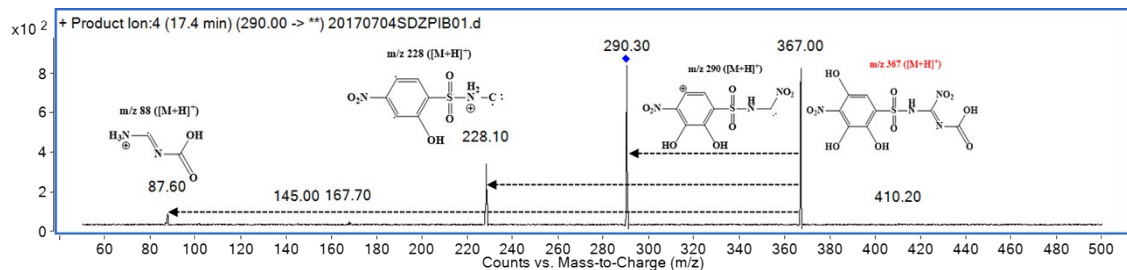

Fig. S8 Identification of P14 ( $m/z^+$  367)  
Product ion 290, 228, 169 and 88

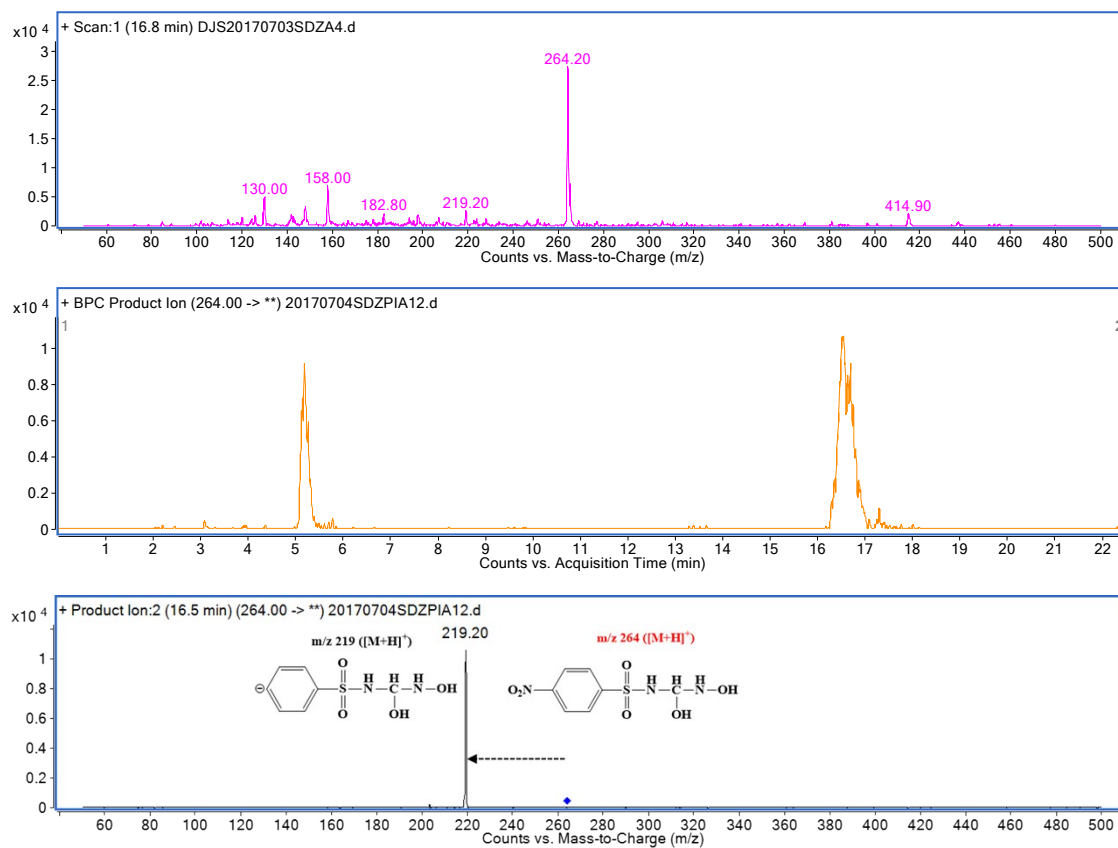

Fig. S9 Identification of P17 ( $m/z^+$  264)  
Product ion 219

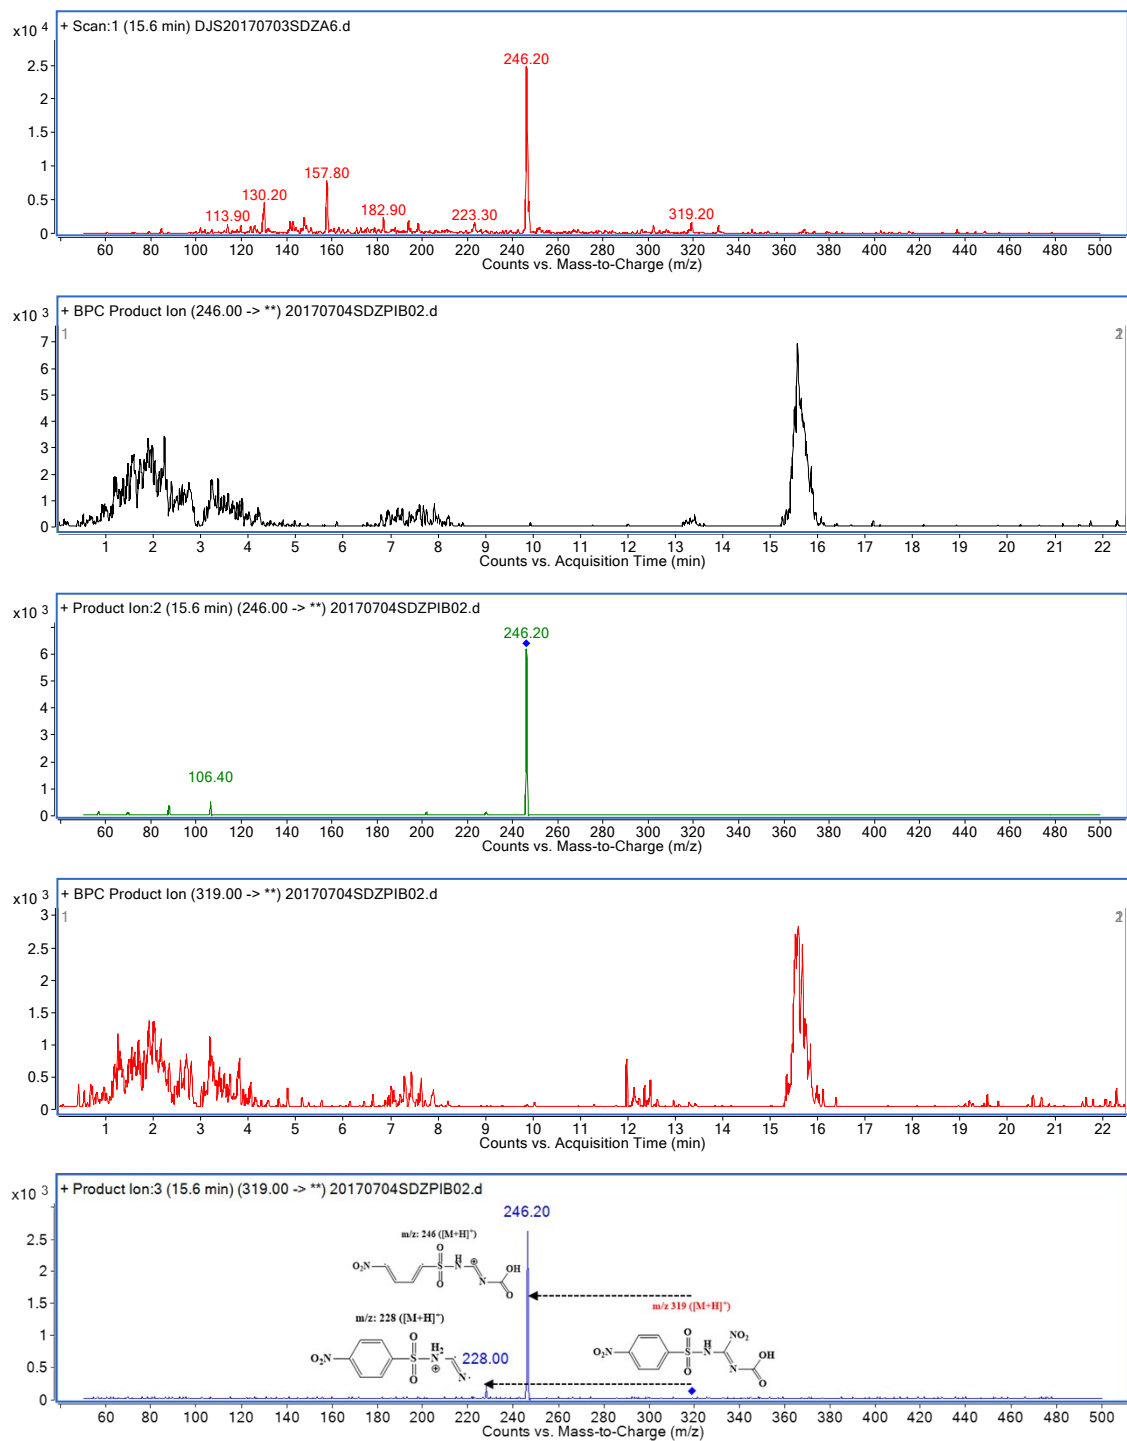

Fig. S10 Identification of P12 ( $m/z^+ 319$ )  
Product ion 246 and 228

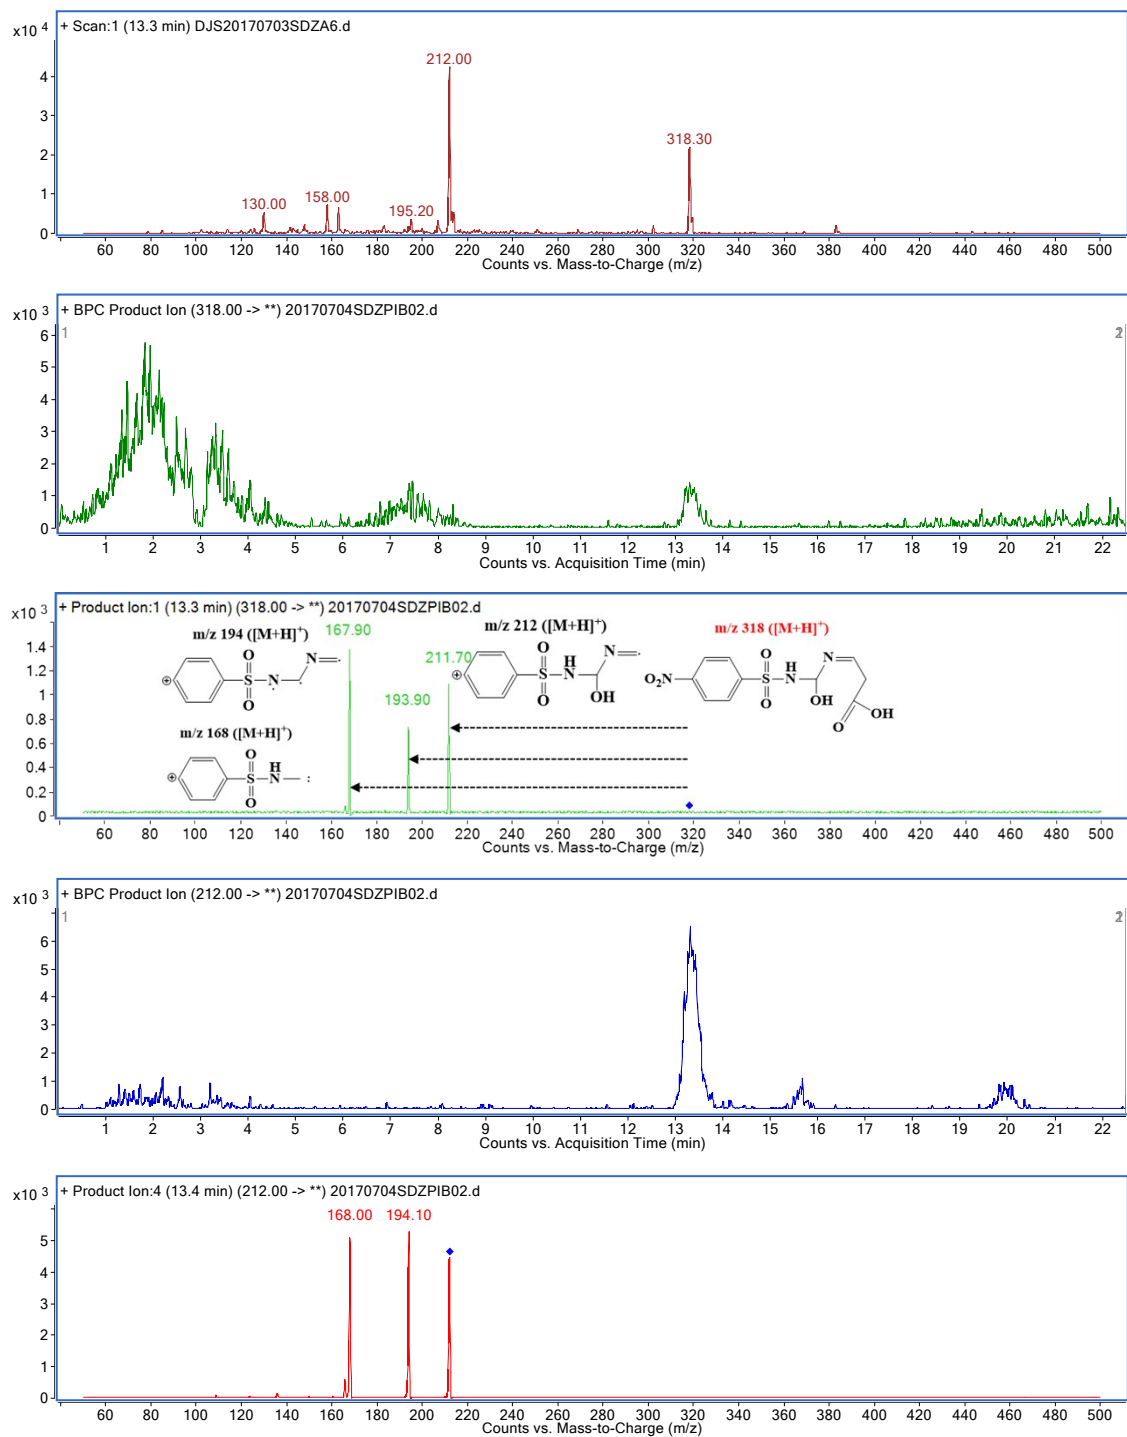

Fig. S11 Identification of P15 (m/z<sup>+</sup> 318)  
Product ion 212, 194, and 168

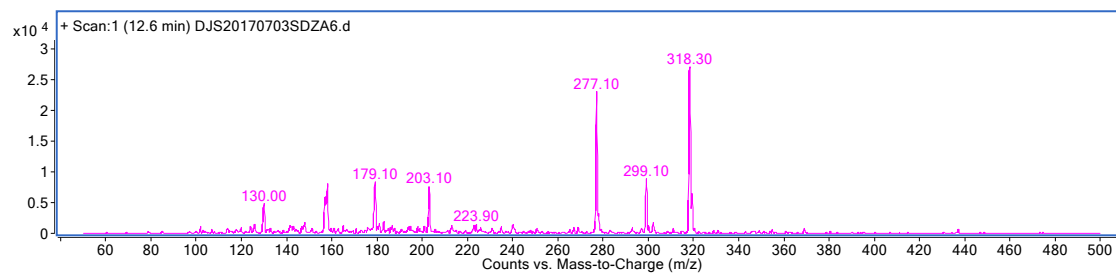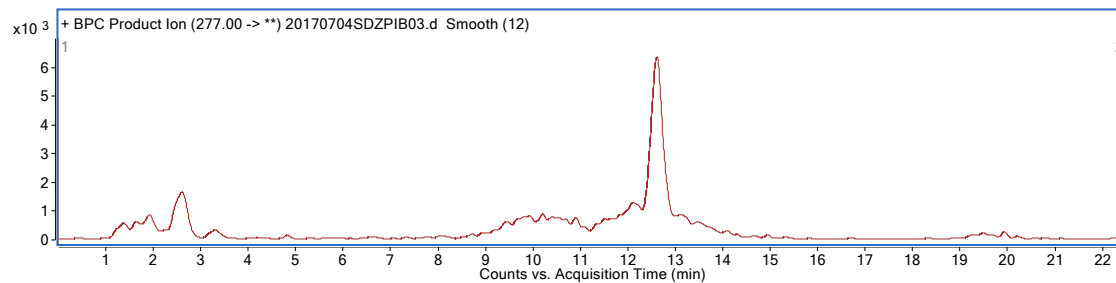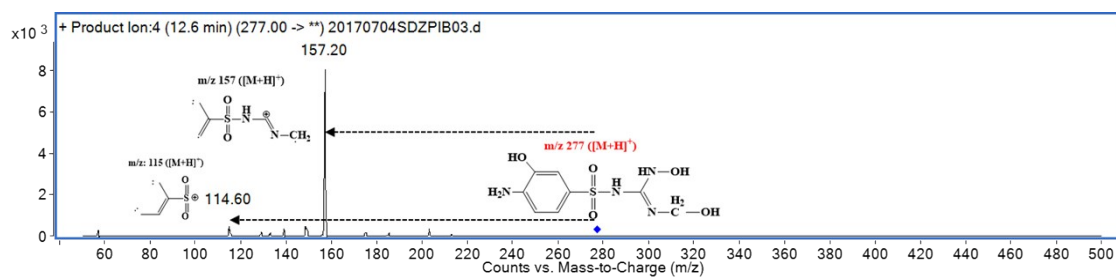

Fig. S12 Identification of P20 (m/z<sup>+</sup> 277)  
Product ion 157 and 114

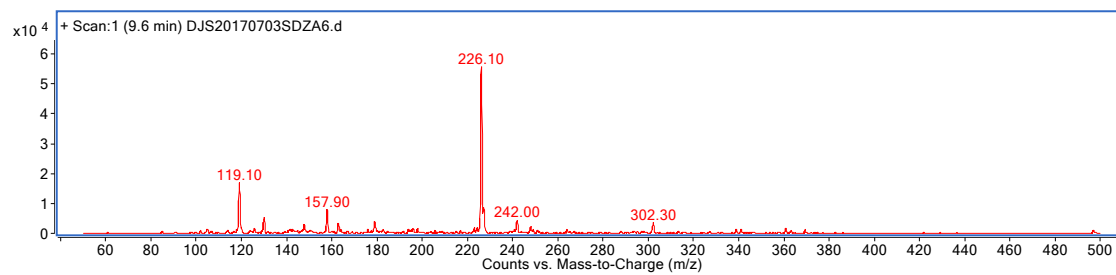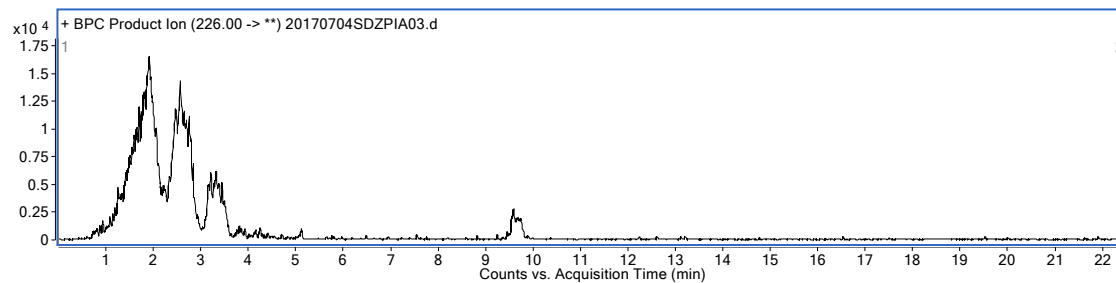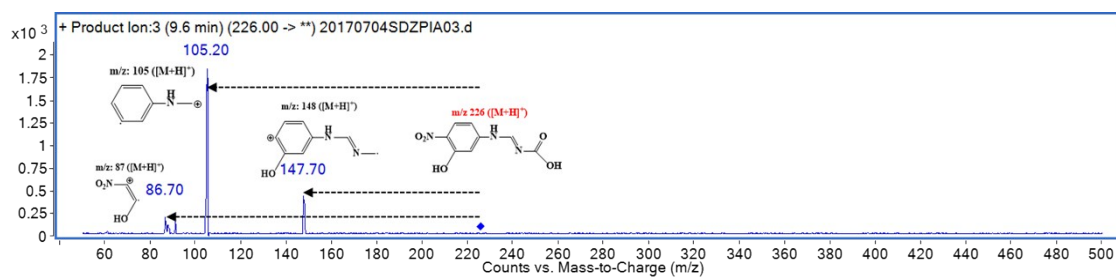

Fig. S13 Identification of P2 ( $m/z^+ 226$ )  
Product ion 148, 105, and 87

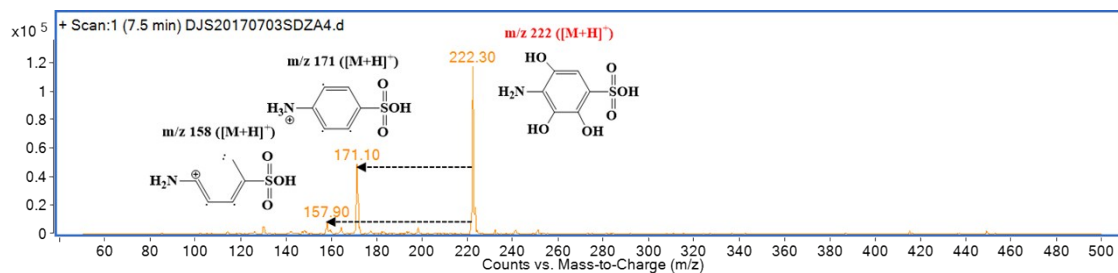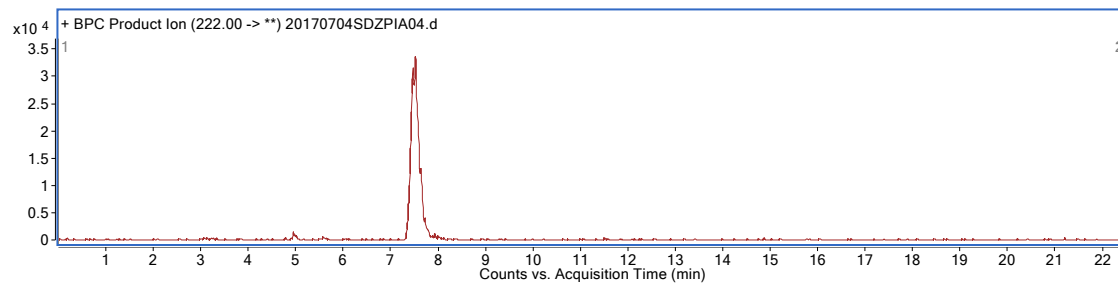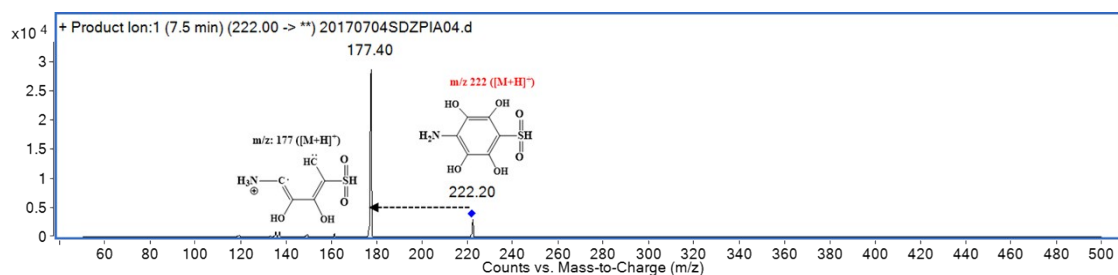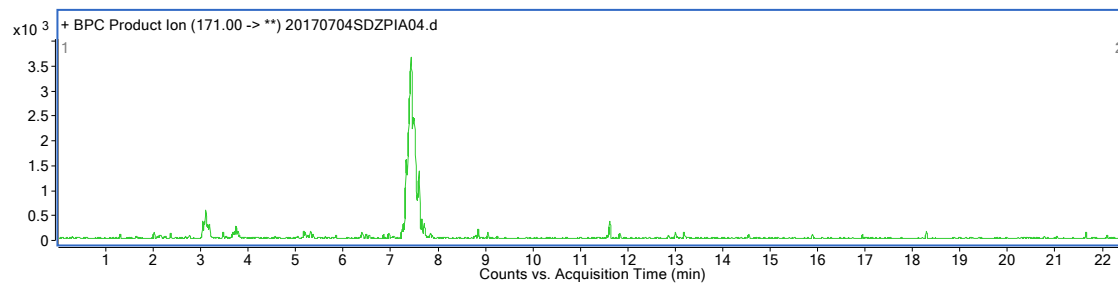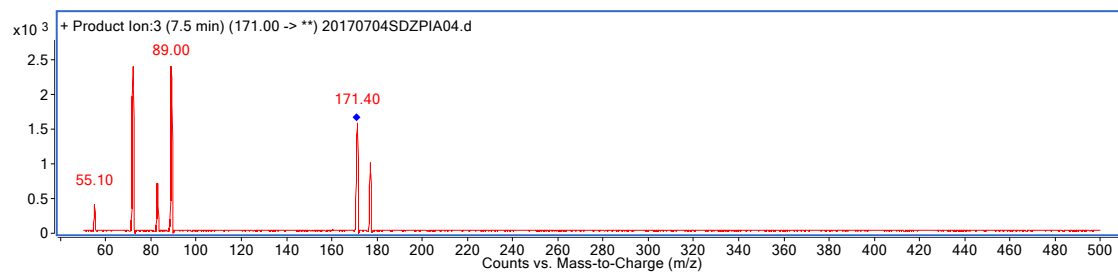

Fig. S14 Identification of P4 ( $m/z^+$  222)  
 Product ion 177, 171, and 89

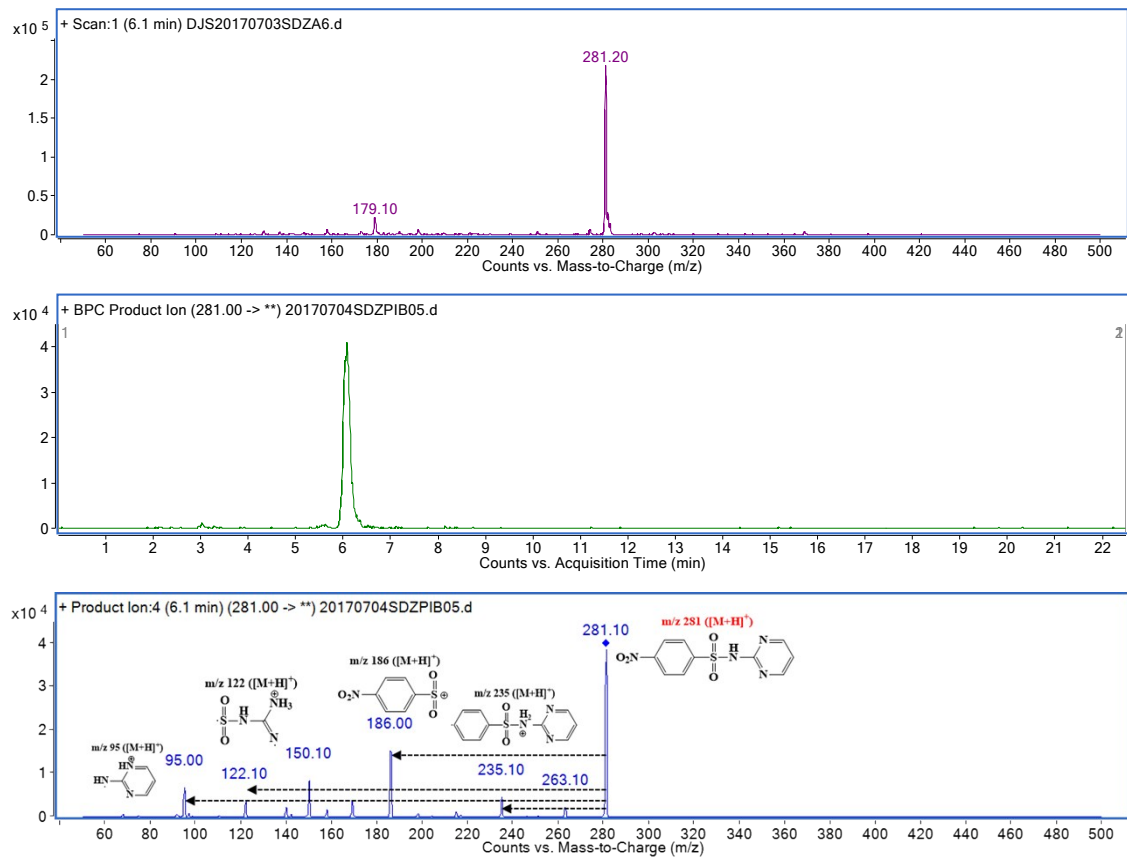

Fig. S15 Identification of P11 (m/z<sup>+</sup> 281)  
Product ion 263, 235, 186, 150, 122, and 95



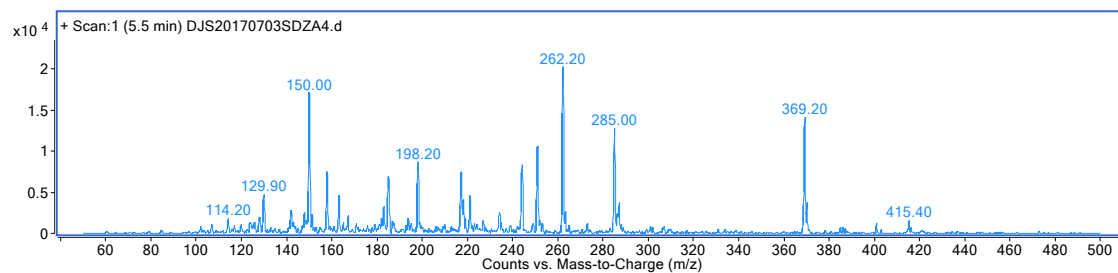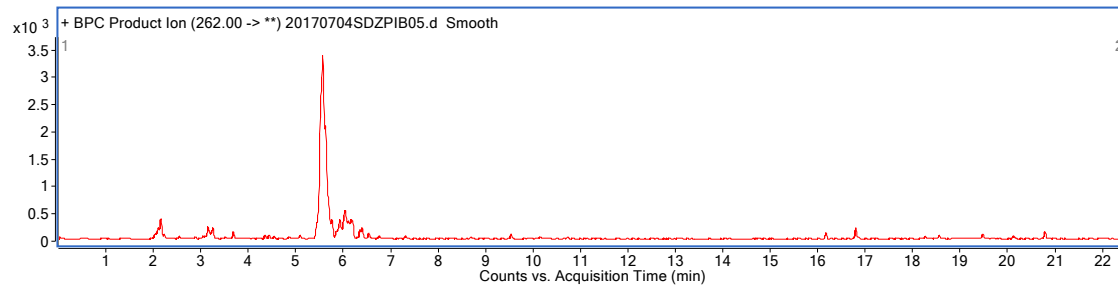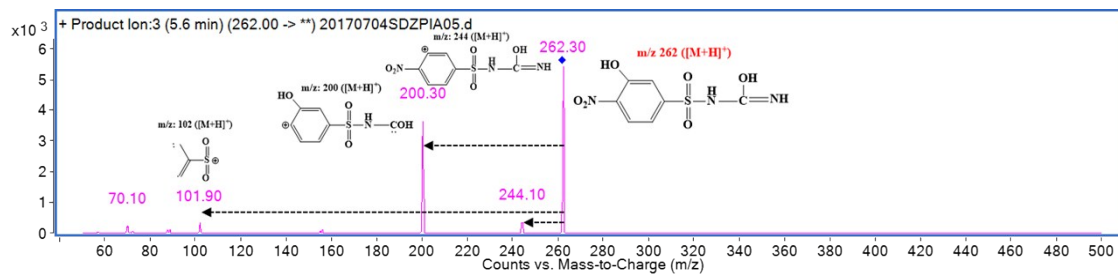

Fig. S16 Identification of P18 ( $m/z^+ 262$ )  
Product ion 244, 200, and 102

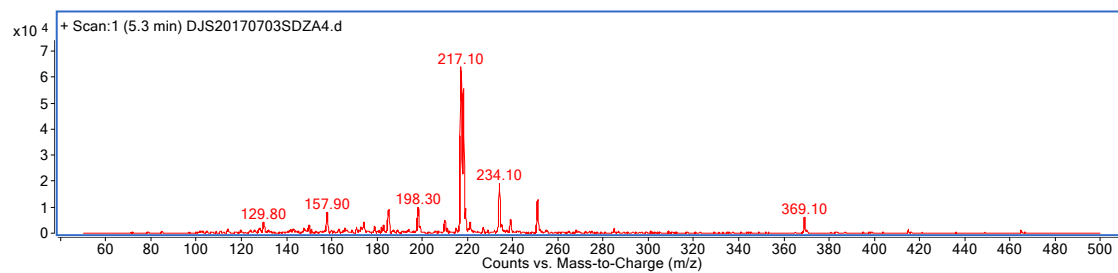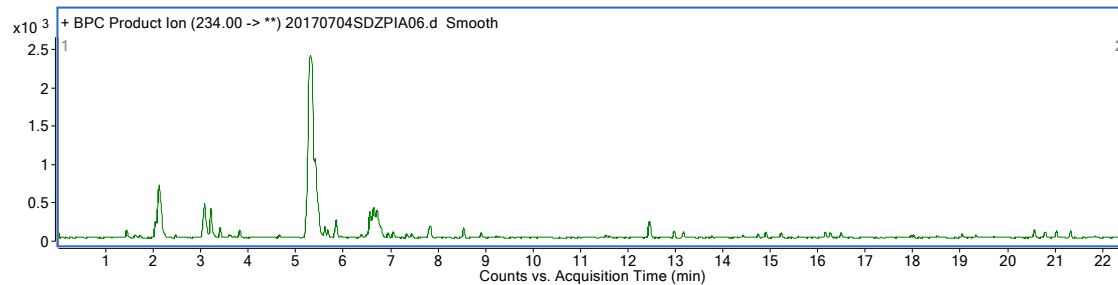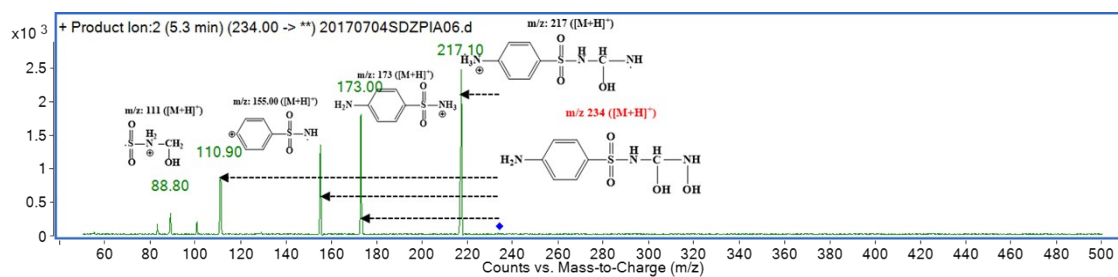

Fig. S17 Identification of P10 ( $m/z^+$  234)  
Product ion 217, 173, 155, and 111

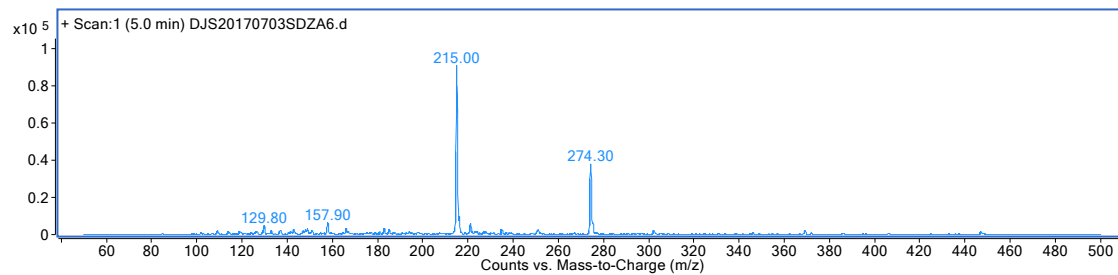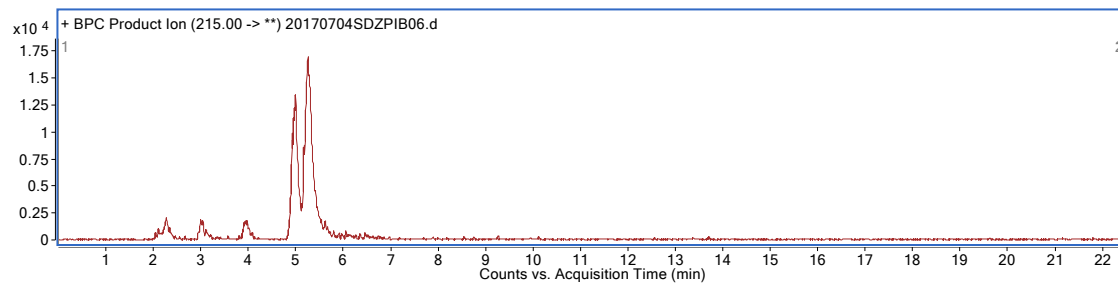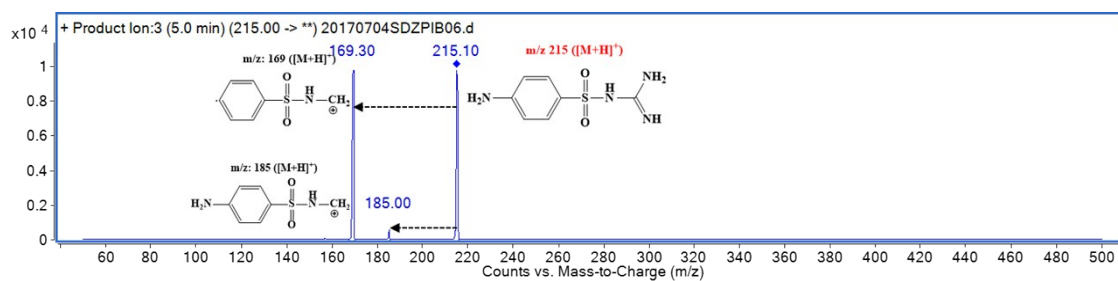

Fig. S18 Identification of P9 ( $m/z^+ 215$ )  
 Product ion 185 and 169

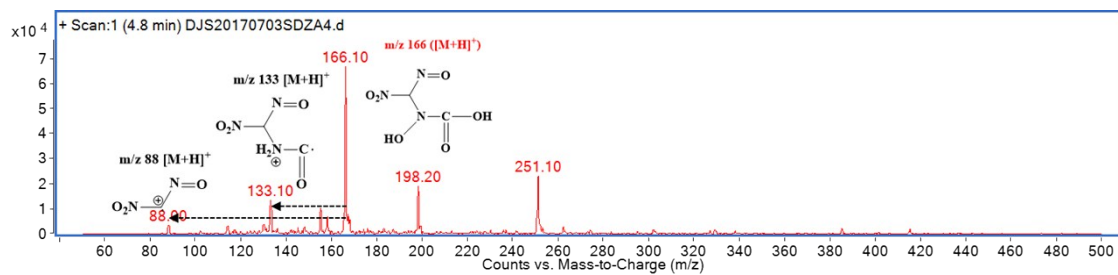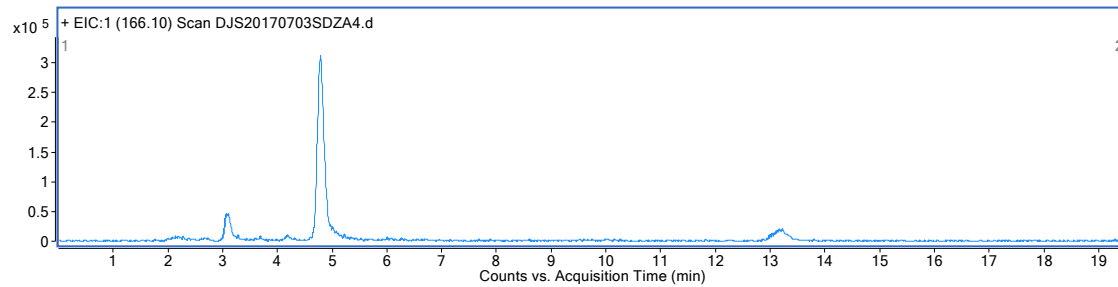

Fig. S19 Identification of P7 ( $m/z^+$  166)  
Product ion 133 and 88

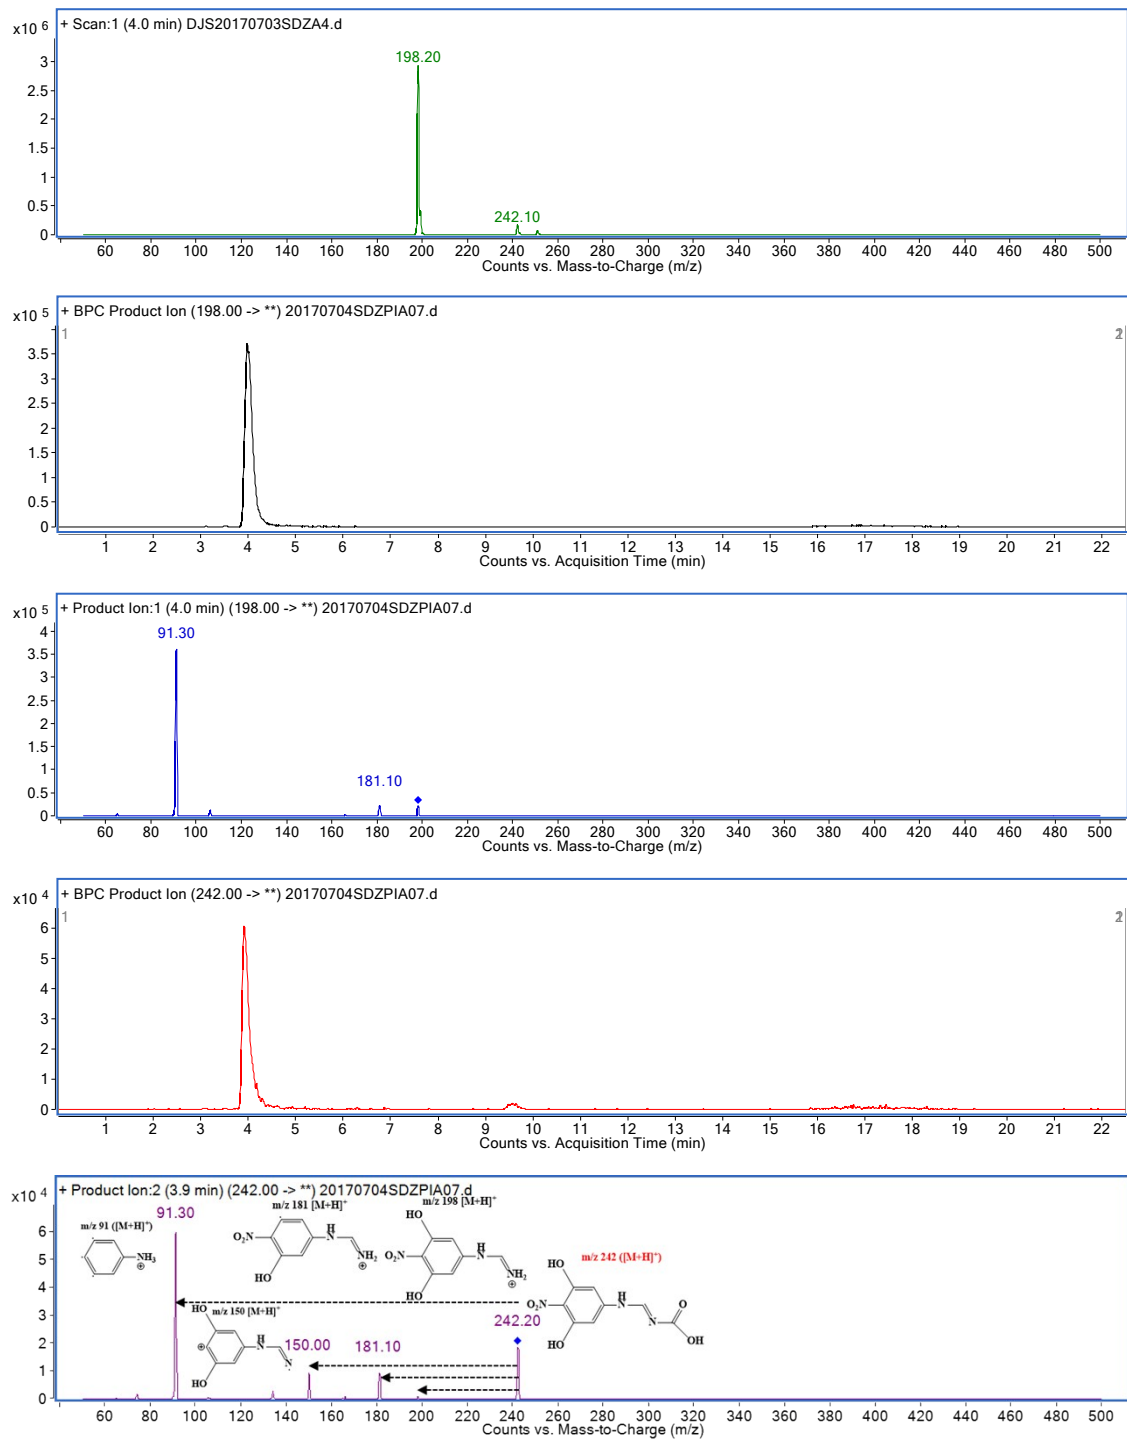

Fig. S20 Identification of P3 ( $m/z^+$  242)  
Product ion 198, 181, 150, and 91

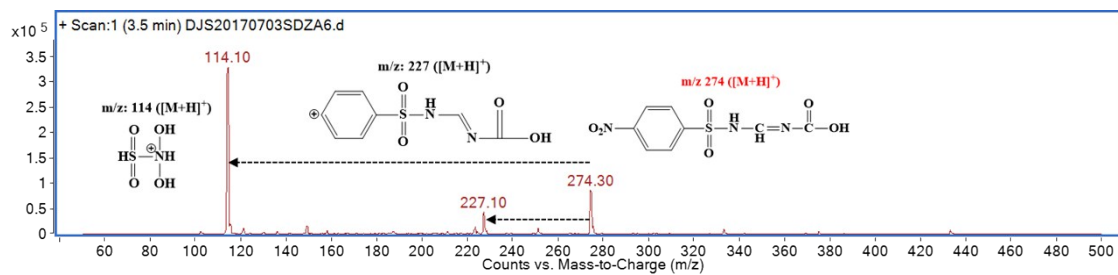

Fig. S21 Identification of P16 ( $m/z^+ 274$ )  
Product ion 227 and 114

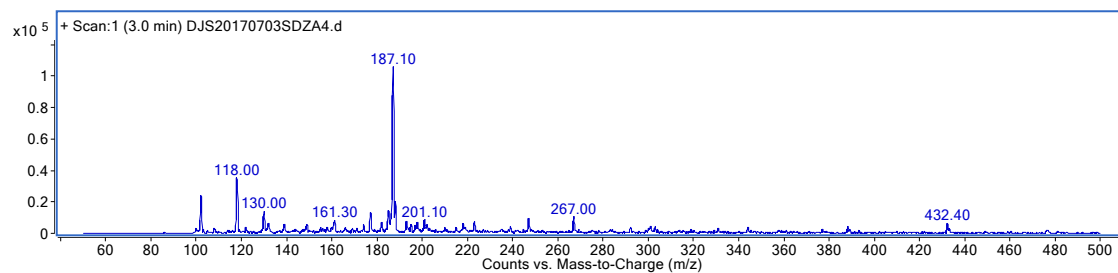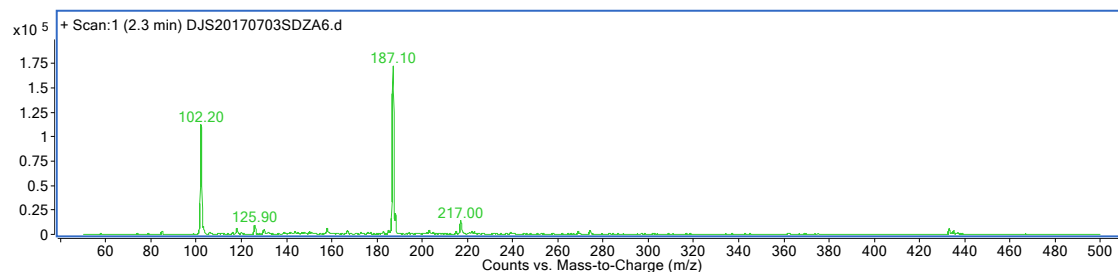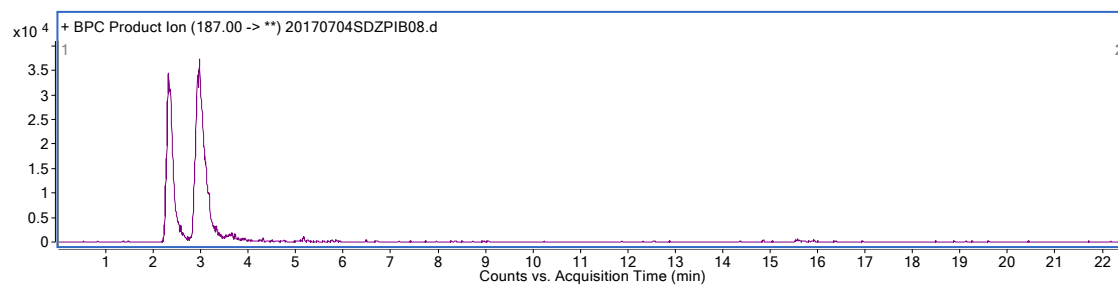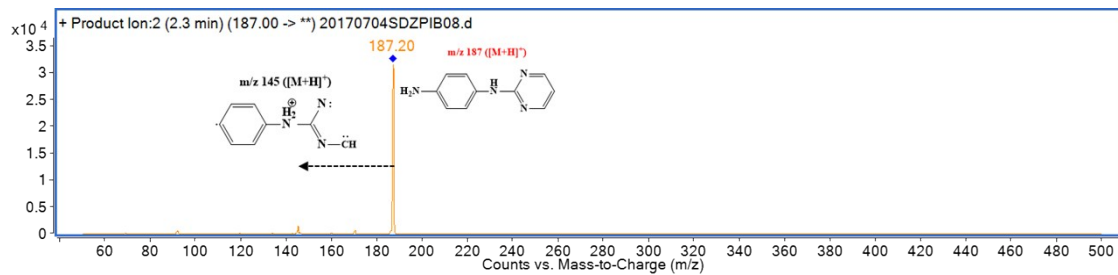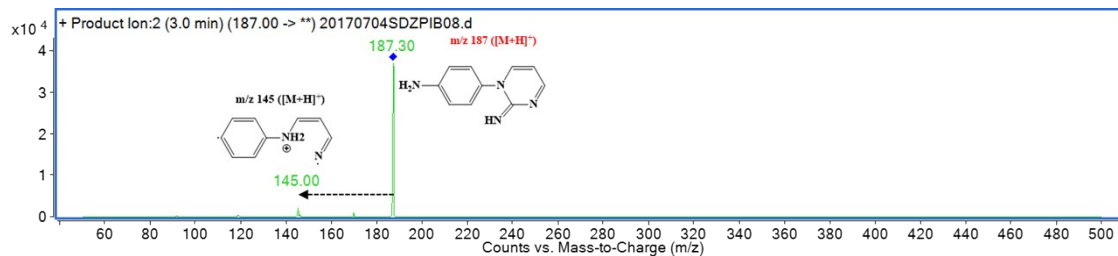

Fig. S22 Identification of P1 ( $m/z^+$  187)  
Product ion 145

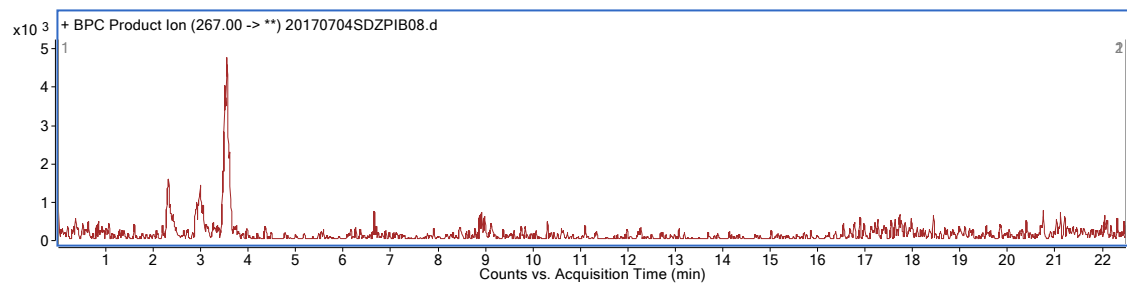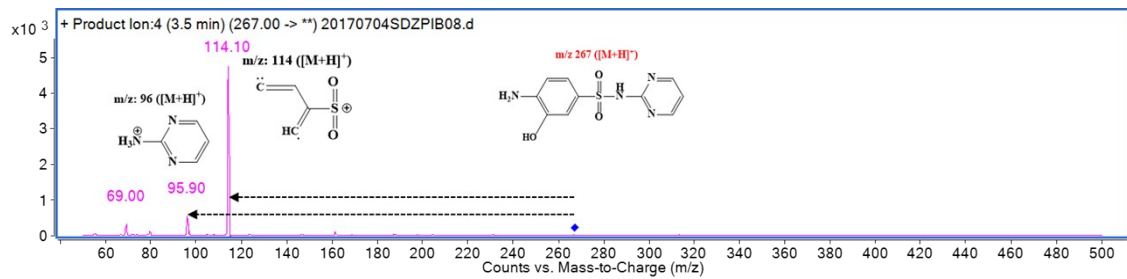

Fig. S23 Identification of P19 ( $m/z^+$  267)  
Product ion 114 and 96



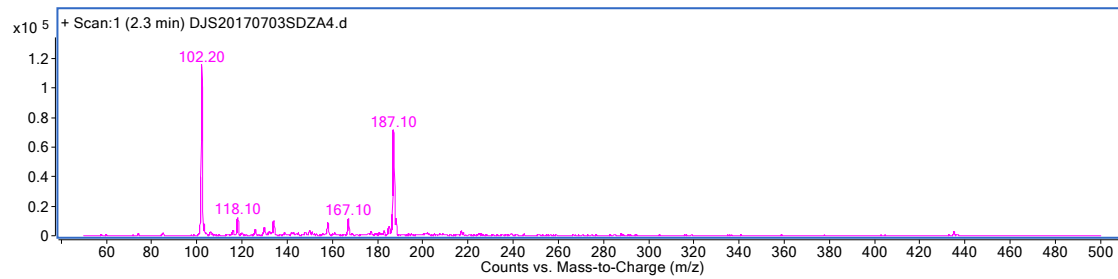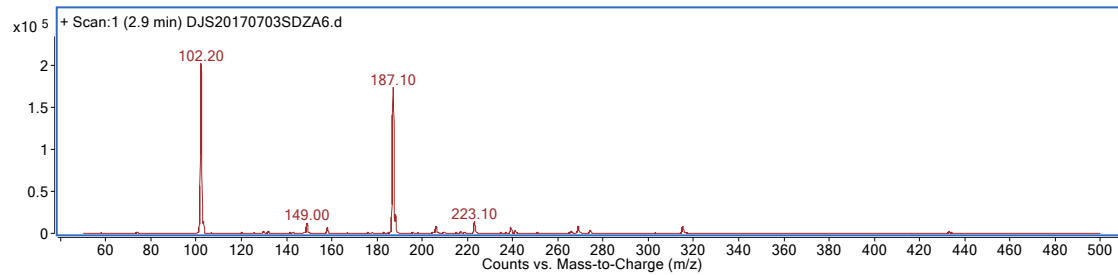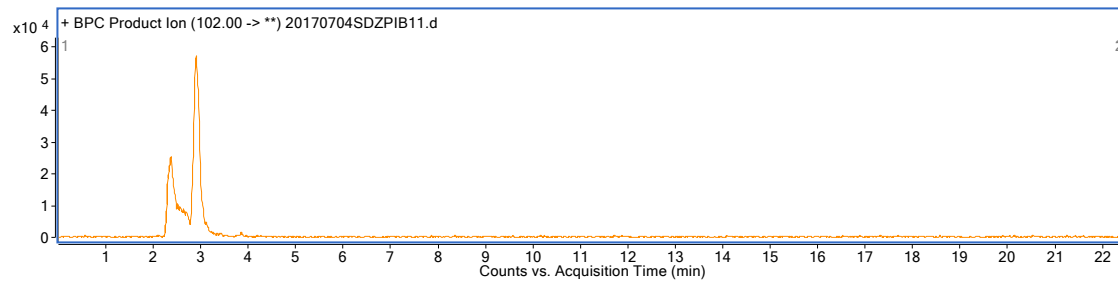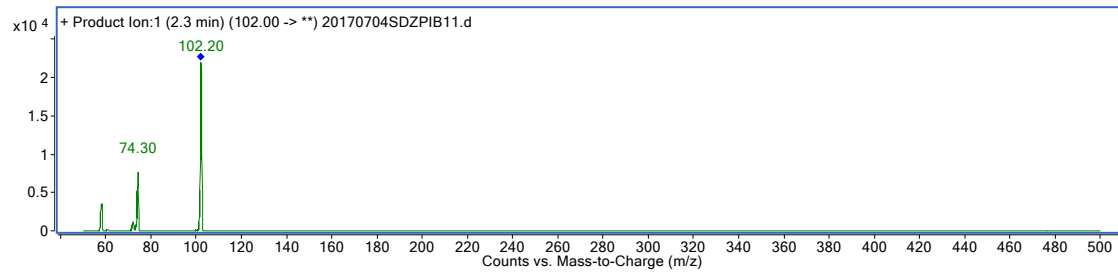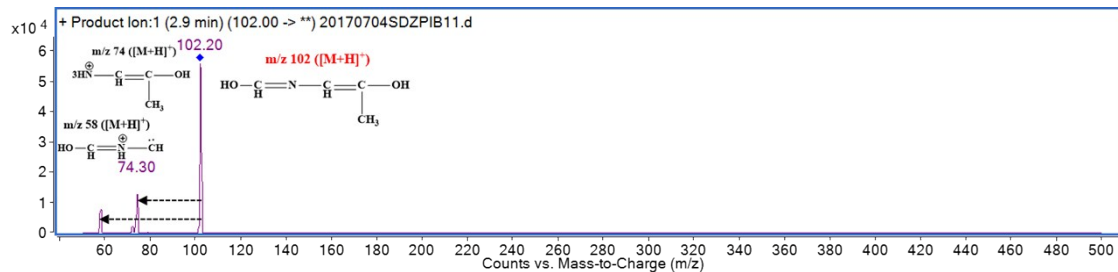

Fig. S24 Identification of P8 ( $m/z^+$  102)  
Product ion 74 and 58

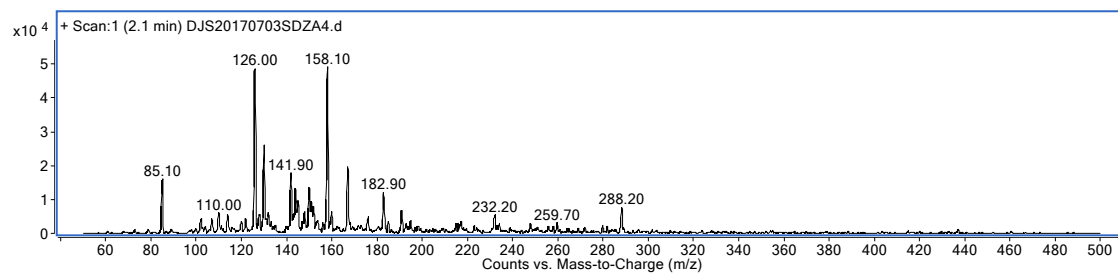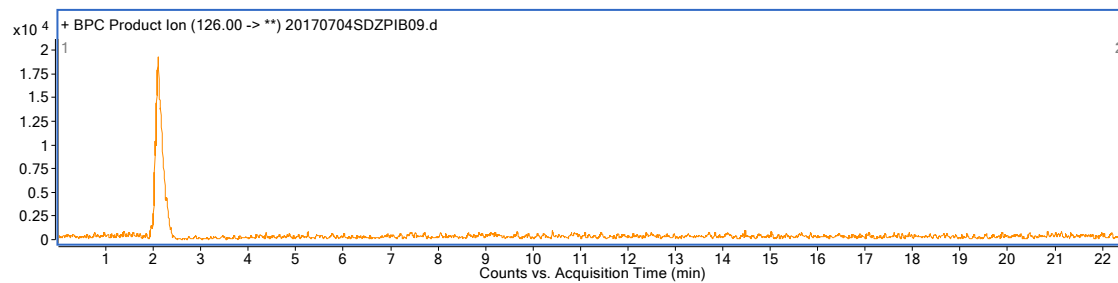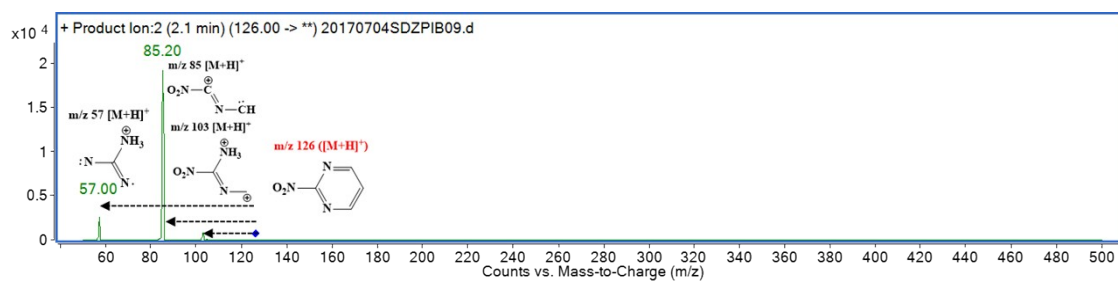

Fig. S25 Identification of P6 ( $m/z^+ 126$ )  
Product ion 85 and 57

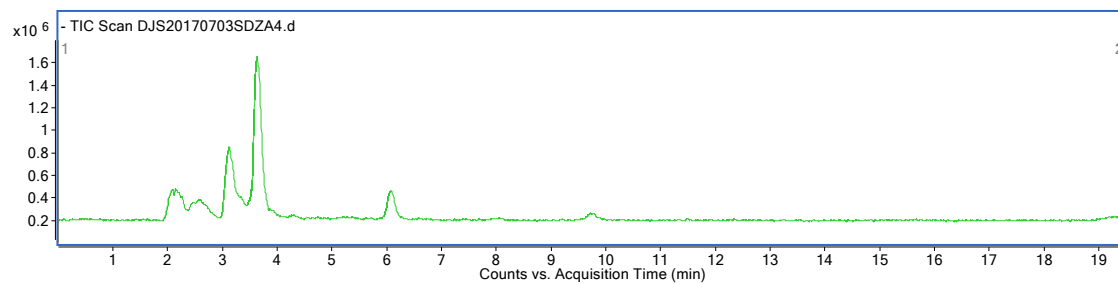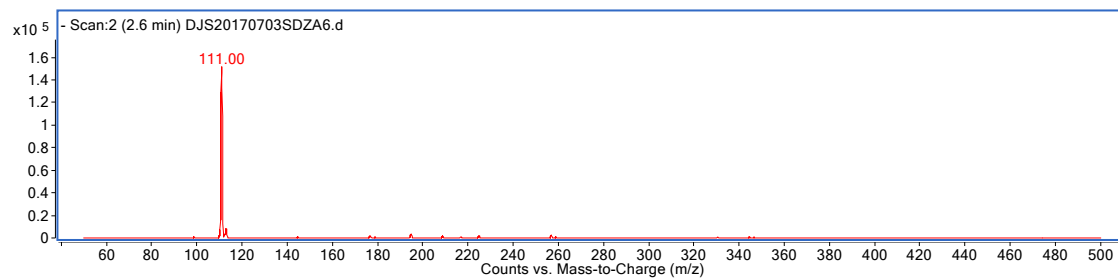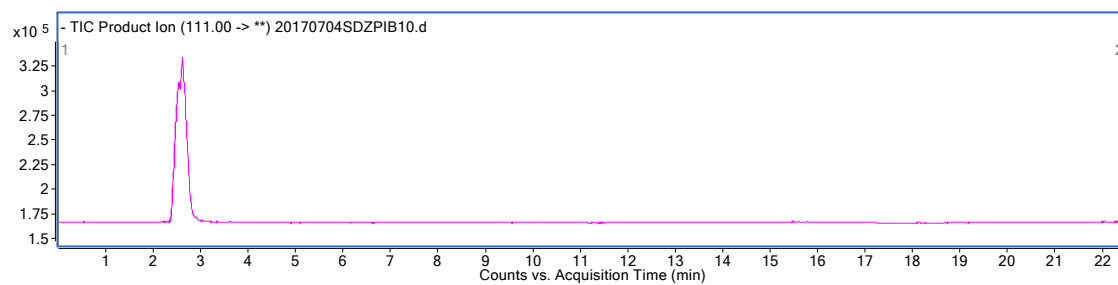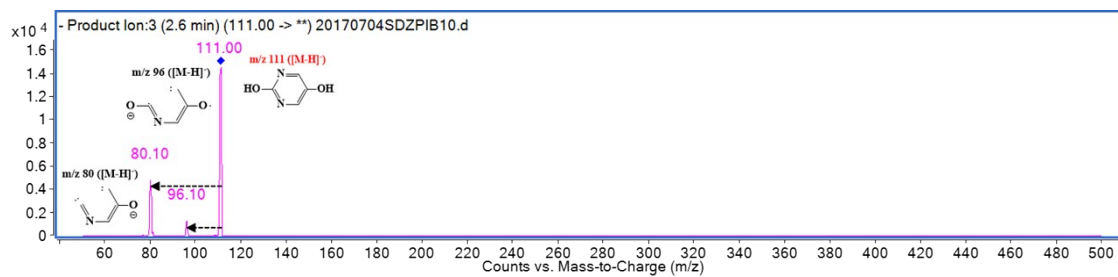

Fig. S26 Identification of P5 (m/z 111)  
Product ion 96 and 80

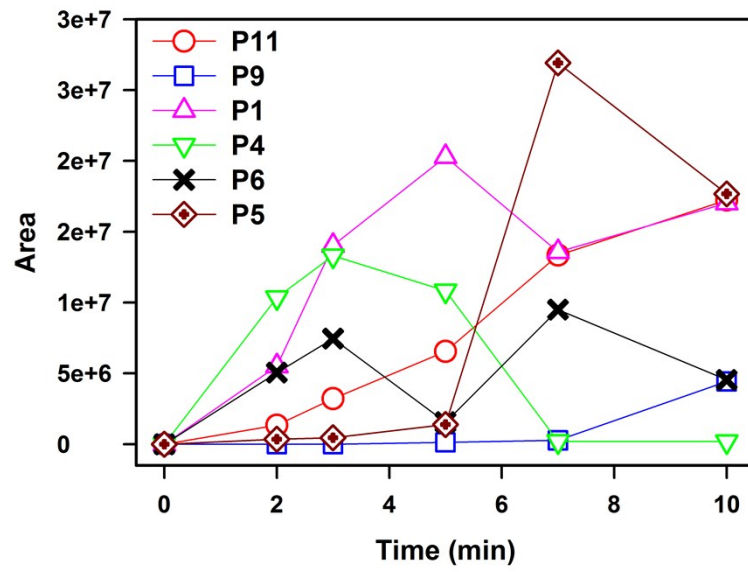

Fig. S27 Peak area for typical compounds of three pathways via  $\bullet\text{SO}_4^-$  detected by UHPLC-MS/MS

Table S1 Summary of pseudo-first-order rate constants for SDZ removal by  $\text{Fe}^0/\text{PS}$  in the

presence of various background materials

| Concentration of aquatic matrixes | $k_{\text{obs}}$ (min <sup>-1</sup> ) |
|-----------------------------------|---------------------------------------|
| Control (0 mM)                    | 0.3969                                |
| Sulfate (1 mM)                    | 0.2773                                |
| Sulfate (5 mM)                    | 0.2348                                |
| Sulfate (10 mM)                   | 0.2768                                |
| Sulfate (50 mM)                   | 0.2156                                |
| Chloride (1 mM)                   | 0.3378                                |
| Chloride (5 mM)                   | 0.3388                                |
| Chloride (10 mM)                  | 0.3338                                |
| Chloride (50 mM)                  | 0.3522                                |
| Nitrate (1 mM)                    | 0.3117                                |
| Nitrate (5 mM)                    | 0.2743                                |
| Nitrate (10 mM)                   | 0.233                                 |
| Nitrate (50 mM)                   | 0.1359                                |
| Perchlorate (1 mM)                | 0.3413                                |
| Perchlorate (5 mM)                | 0.3164                                |
| Perchlorate (10 mM)               | 0.3128                                |
| Perchlorate (50 mM)               | 0.3186                                |
| Humic acid (1 mg/L as TOC)        | 0.0681                                |
| Humic acid (3 mg/L as TOC)        | 0.0418                                |
| Humic acid (5 mg/L as TOC)        | 0.0254                                |
| Bicarbonate (0.5 mM)              | 0.1862                                |
| Bicarbonate (1 mM)                | 0.1221                                |
| Bicarbonate (2 mM)                | 0.0836                                |
| Bicarbonate (5 mM)                | 0.0418                                |
